# Supplementary material for: Heterologous Expression of the Marine-Derived Quorum Quenching Enzyme MomL Can Expand the Antibacterial Spectrum of Bacillus brevis
Source: PubMed Central journal article supplement (PMC6409708; doi:10.3390/md17020128), 2019-02-21
Supplement: marinedrugs-17-00128-s001.pdf [file marinedrugs-17-00128-s001.pdf]

## Supplementary Materials

# Heterologous Expression of the Marine-Derived Quorum Quenching Enzyme MomL Can Expand the Antibacterial Spectrum of *Bacillus brevis*

Jingjing Zhang <sup>1</sup>, Jiayi Wang <sup>1</sup>, Tao Feng <sup>1</sup>, Rui Du <sup>1</sup>, Xiaorong Tian <sup>1</sup>, Yan Wang <sup>1,2,3,\*</sup> and Xiao-Hua Zhang <sup>1,2,3</sup>

<sup>1</sup> MOE Key Laboratory of Marine Genetics and Breeding, College of Marine Life Sciences, Ocean University of China, Qingdao 266003, China; jingjingzhangnn@163.com (J.Z.); wangjiayi109911@163.com (J.W.); fengtao246@163.com (F.T.); drury612@163.com (R.D.); tianxr123@sina.com (X.T.); xhzhang@ouc.edu.cn (X.Z.)

<sup>2</sup> Laboratory for Marine Ecology and Environmental Science, Qingdao National Laboratory for Marine Science and Technology, Qingdao 266071, China

<sup>3</sup> Institute of Evolution & Marine Biodiversity, Ocean University of China, Qingdao 266003, China

\* Correspondence: wangy12@ouc.edu.cn; Tel.: +86-532-8203-2721.

## Supplementary Materials

|                                                        |   |
|--------------------------------------------------------|---|
| Table S1. Bacteria and plasmids used in the study..... | 1 |
| Table S2. Medium compositions used in this study.....  | 2 |

**Table S1.** Bacteria and plasmids used in the study.

| Strains or Plasmids                                         | Relevant Characteristics and Purpose                                                                                                                                                                                                                                                                                            |
|-------------------------------------------------------------|---------------------------------------------------------------------------------------------------------------------------------------------------------------------------------------------------------------------------------------------------------------------------------------------------------------------------------|
| <b>Strains</b>                                              |                                                                                                                                                                                                                                                                                                                                 |
| BL21 (DE3)                                                  | Competent cell and be used as a host for protein expression                                                                                                                                                                                                                                                                     |
| JM109                                                       | Competent cell; <i>recA1</i> , <i>endA1</i> , <i>hsdR17</i> thi, <i>hsdR17</i> (rk <sup>-</sup> mk <sup>+</sup> ), <i>e14</i> <sup>-</sup> ( <i>mcrA</i> <sup>-</sup> ), <i>supE44</i> , <i>relA1</i> , $\Delta$ ( <i>lac-proAB</i> )/F' [ <i>traD36</i> , <i>proAB</i> <sup>+</sup> , <i>lacIq</i> , <i>lacZ</i> $\Delta$ M15] |
| <i>BbMomL</i>                                               | A strain of <i>B. brevis</i> containing plasmid pNCMO2- <i>momL</i>                                                                                                                                                                                                                                                             |
| <i>Pectobacterium carotovorum</i> subsp. <i>carotovorum</i> | Soft rot pathogenic bacteria of plant, AHL producer                                                                                                                                                                                                                                                                             |
| <i>Pseudomonas aeruginosa</i> PAO1                          | Ubiquitous and metabolically versatile opportunistic pathogen                                                                                                                                                                                                                                                                   |
| <i>Muricauda olearia</i> Th120                              | Belonging to the class <i>Flavobacteriia</i> and has strong AHL degradation activity.                                                                                                                                                                                                                                           |
| <i>Chromobacterium violaceum</i> CV026                      | AHL indicator strain                                                                                                                                                                                                                                                                                                            |
| <i>Agrobacterium tumefaciens</i> A136                       | AHL indicator strain                                                                                                                                                                                                                                                                                                            |
| <b>Plasmids</b>                                             |                                                                                                                                                                                                                                                                                                                                 |
| pNCMO2                                                      | The plasmid pNCMO2, the <i>E. coli</i> – <i>B. brevis</i> shuttle vector, was used as the expression vector. The P2 promoter, derived from a cell wall protein of the host bacterium, was used as the promoter for pNCMO2 expression.                                                                                           |
| pUCm-T                                                      | The pUCm-T vector is an ideal vector for cloning A-terminal PCR products. The recombinant clones with inserted fragments can be screened by blue and white spots.                                                                                                                                                               |

**Table S2.** Medium compositions used in this study.

| <b>Medium Composition</b>                                                                                                                                                                                                                                                                                               |        |
|-------------------------------------------------------------------------------------------------------------------------------------------------------------------------------------------------------------------------------------------------------------------------------------------------------------------------|--------|
| <b>2216 E liquid Medium (1 L)</b>                                                                                                                                                                                                                                                                                       |        |
| Yeast extract                                                                                                                                                                                                                                                                                                           | 1 g    |
| Peptone                                                                                                                                                                                                                                                                                                                 | 5 g    |
| FePO <sub>4</sub>                                                                                                                                                                                                                                                                                                       | 0.1 g  |
| Dissolved in 1000 mL seawater and adjust to pH 7.6.                                                                                                                                                                                                                                                                     |        |
| 2216 E plates (1 L)                                                                                                                                                                                                                                                                                                     |        |
| Suspend 20 g of agar in 1000 mL of 2216 E liquid medium and sterilize 121 °C for 20 min using an autoclave. Let stand at room temperature until it has cooled to approximately 50 °C. Mix gently then dispense into plates.                                                                                             |        |
| <b>MTNm liquid medium (1 L)</b>                                                                                                                                                                                                                                                                                         |        |
| Glucose* <sup>1</sup>                                                                                                                                                                                                                                                                                                   | 10.0 g |
| Polypeptone                                                                                                                                                                                                                                                                                                             | 10.0 g |
| Meat Extract                                                                                                                                                                                                                                                                                                            | 5.0 g  |
| yeast extract                                                                                                                                                                                                                                                                                                           | 2.0 g  |
| FeSO <sub>4</sub> · 7H <sub>2</sub> O                                                                                                                                                                                                                                                                                   | 10 mg  |
| MnSO <sub>4</sub> · 4H <sub>2</sub> O                                                                                                                                                                                                                                                                                   | 10 mg  |
| ZnSO <sub>4</sub> · 7H <sub>2</sub> O                                                                                                                                                                                                                                                                                   | 1 mg   |
| MgCl <sub>2</sub> · 6H <sub>2</sub> O                                                                                                                                                                                                                                                                                   | 4.1 g  |
| Dissolved in 1000 mL distilled water and adjust to pH 7.0.                                                                                                                                                                                                                                                              |        |
| <b>MTNm plates</b>                                                                                                                                                                                                                                                                                                      |        |
| Suspend 15 g of agar in 1000 mL of MTNm liquid medium and sterilize 121 °C for 20 min using an autoclave. Let stand at room temperature until it has cooled to approximately 50 °C and then add neomycin solution (10 mg/mL stock solution) to a final concentration of 10 µg/mL. Mix gently then dispense into plates. |        |
| Luria-Bertani liquid medium (LB, 1 L)                                                                                                                                                                                                                                                                                   |        |
| Yeast extract                                                                                                                                                                                                                                                                                                           | 5 g    |

|         |      |
|---------|------|
| Peptone | 10 g |
| NaCl    | 10 g |

Dissolved in 1000 mL distilled water and adjust to pH 7.0.

---

#### Luria-Bertani plates

---

Suspend 20 g of agar in 1000 mL of LB liquid medium and sterilize 121 °C for 20 min using an autoclave. Let stand at room temperature until it has cooled to approximately 50 °C and then add different concentrations of antibiotics. Mix gently then dispense into plates.

---

#### *Pseudomonas* broth (PB, 1 L)

---

|                                |       |
|--------------------------------|-------|
| Peptone                        | 20 g  |
| MgCl <sub>2</sub>              | 1.4 g |
| K <sub>2</sub> SO <sub>4</sub> | 10 g  |
| Glycerine                      | 10 mL |

Dissolved in 1000 mL distilled water and adjust to pH 7.6.

---

\*1: Sterilize glucose and glucose-free media separately. Mix after sterilization.
